# Supplementary material for: The key role of the composition and structural features in fluoride ion conductivity in tysonite Ce1−xSrxF3−x solid solutions
Source: Royal Society of Chemistry journal article supplement (doi:10.1039/c6dt04714a), 2017-01-01
Supplement: c6dt04714a1.pdf [file c6dt04714a1.pdf]

# Key-role of composition and structural features on fluoride ion conductivity in tysonite $\text{Ce}_{1-x}\text{Sr}_x\text{F}_{3-x}$ solid solutions

Belto Dieudonné, Johann Chable, Monique Body, Christophe Legein, Etienne Durand, Fabrice Mauvy, Sébastien Fourcade, Marc Leblanc, Vincent Maisonneuve, and Alain Demourgues

## Electronic Supporting Information

|                                                                                                                                                                                                                                                                                                                                               |    |
|-----------------------------------------------------------------------------------------------------------------------------------------------------------------------------------------------------------------------------------------------------------------------------------------------------------------------------------------------|----|
| <b>Fig. S1.</b> Powder XRD Rietveld refinement of $\text{CeF}_3$ .....                                                                                                                                                                                                                                                                        | 2  |
| <b>Fig. S2.</b> Powder XRD Rietveld refinement of $\text{Ce}_{0.99}\text{Sr}_{0.01}\text{F}_{2.99}$ .....                                                                                                                                                                                                                                     | 2  |
| <b>Fig. S3.</b> Powder XRD Rietveld refinement of $\text{Ce}_{0.95}\text{Sr}_{0.05}\text{F}_{2.95}$ .....                                                                                                                                                                                                                                     | 3  |
| <b>Fig. S4.</b> Powder XRD Rietveld refinement of $\text{Ce}_{0.93}\text{Sr}_{0.07}\text{F}_{2.93}$ .....                                                                                                                                                                                                                                     | 3  |
| <b>Fig. S5.</b> Powder XRD Rietveld refinement of $\text{Ce}_{0.90}\text{Sr}_{0.10}\text{F}_{2.90}$ .....                                                                                                                                                                                                                                     | 4  |
| <b>Table S1.</b> Unit cell parameters (Å) and volume (Å <sup>3</sup> ) of $\text{Ce}_{1-x}\text{Sr}_x\text{F}_{3-x}$ .....                                                                                                                                                                                                                    | 4  |
| <b>Table S2.</b> F–(Ce,Sr) distances (Å) in $\text{Ce}_{1-x}\text{Sr}_x\text{F}_{3-x}$ .....                                                                                                                                                                                                                                                  | 5  |
| <b>Fig. S6.</b> <sup>19</sup> F MAS NMR spectra of $\text{CeF}_3$ recorded at 64 kHz and 54 kHz.....                                                                                                                                                                                                                                          | 6  |
| <b>Fig. S7.</b> Experimental and fitted <sup>19</sup> F MAS (64 kHz) NMR spectra of $\text{Ce}_{0.975}\text{Sr}_{0.025}\text{F}_{2.975}$ .....                                                                                                                                                                                                | 7  |
| <b>Table S3.</b> Isotropic chemical shift, chemical shift anisotropy, asymmetry parameter of the CSA tensor, linewidth, relative intensity and assignment of the NMR resonances used for the fit of the <sup>19</sup> F MAS (64 kHz) NMR spectrum of $\text{Ce}_{0.975}\text{Sr}_{0.025}\text{F}_{2.975}$ .....                               | 7  |
| <b>Fig. S8.</b> Experimental and fitted <sup>19</sup> F MAS (64 kHz) NMR spectra of $\text{Ce}_{0.95}\text{Sr}_{0.05}\text{F}_{2.95}$ .....                                                                                                                                                                                                   | 8  |
| <b>Table S4.</b> Isotropic chemical shift, chemical shift anisotropy, asymmetry parameter of the CSA tensor, linewidth, relative intensity and assignment of the NMR resonances used for the fit of the <sup>19</sup> F MAS (64 kHz) NMR spectrum of $\text{Ce}_{0.95}\text{Sr}_{0.05}\text{F}_{2.95}$ .....                                  | 8  |
| <b>Table S5.</b> Relative intensities of the <sup>19</sup> F NMR resonances assigned to F1 and F2,3, expected from formulation considering fluorine vacancies on F1 site and estimated from the fits of the NMR spectra recorded at 64°C and fractions of mobile F2 and F3 atoms in $\text{Ce}_{1-x}\text{Sr}_x\text{F}_{3-x}$ compounds..... | 9  |
| <b>Fig. S9.</b> <sup>19</sup> F MAS NMR spectra of $\text{Ce}_{0.99}\text{Sr}_{0.01}\text{F}_{2.99}$ recorded at 64 kHz and 54 kHz.....                                                                                                                                                                                                       | 10 |
| <b>Fig. S10.</b> <sup>19</sup> F MAS NMR spectra of $\text{Ce}_{0.975}\text{Sr}_{0.025}\text{F}_{2.975}$ recorded at 64 kHz and 54 kHz.....                                                                                                                                                                                                   | 10 |
| <b>Fig. S11.</b> Nyquist diagram obtained at 25 °C for a sintered pellet of $\text{Ce}_{0.975}\text{Sr}_{0.025}\text{F}_{2.975}$ .....                                                                                                                                                                                                        | 11 |

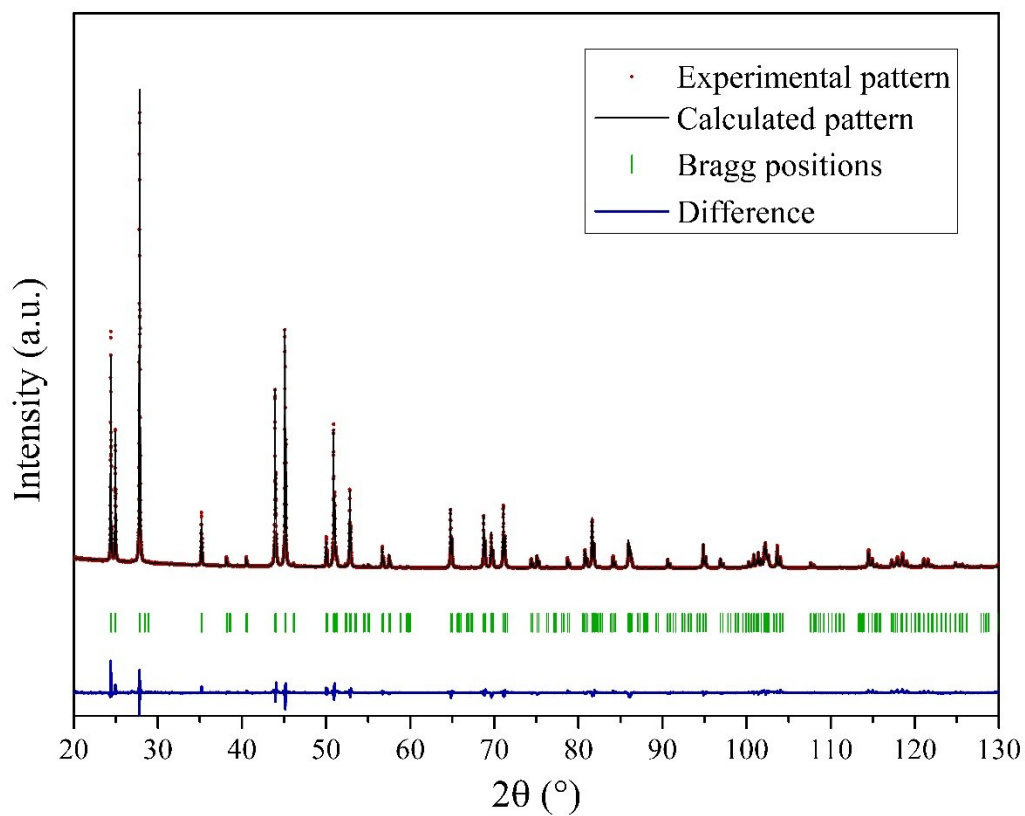

**Fig. S1.** Powder XRD Rietveld refinement of  $\text{CeF}_3$ .

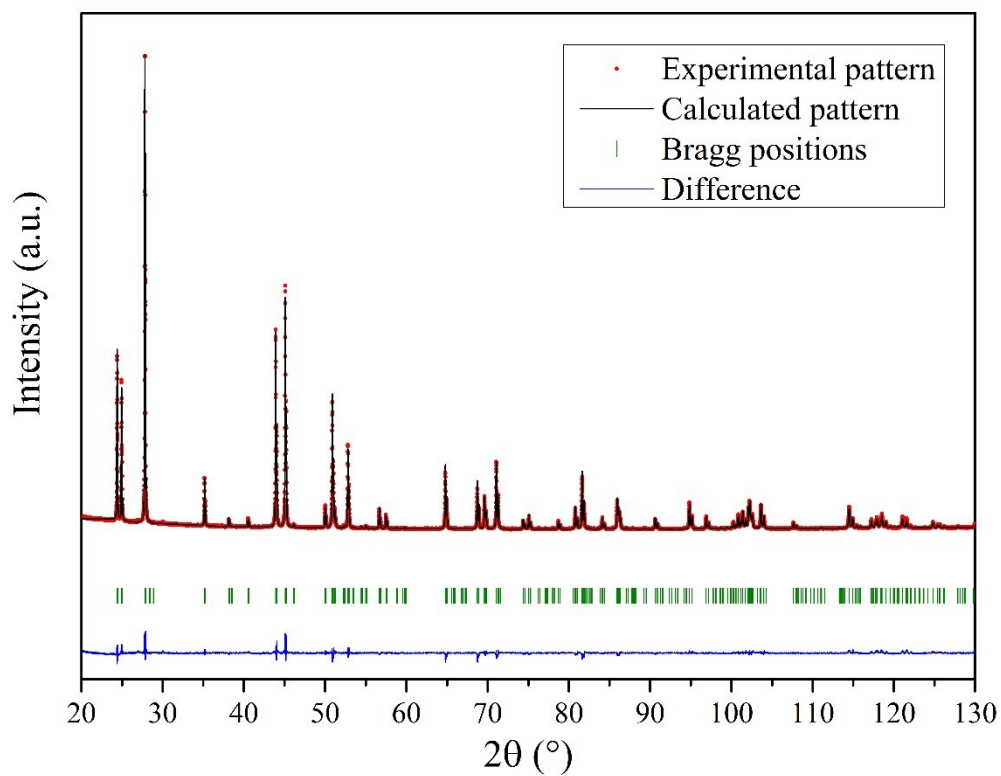

**Fig. S2.** Powder XRD Rietveld refinement of  $\text{Ce}_{0.99}\text{Sr}_{0.01}\text{F}_{2.99}$ .

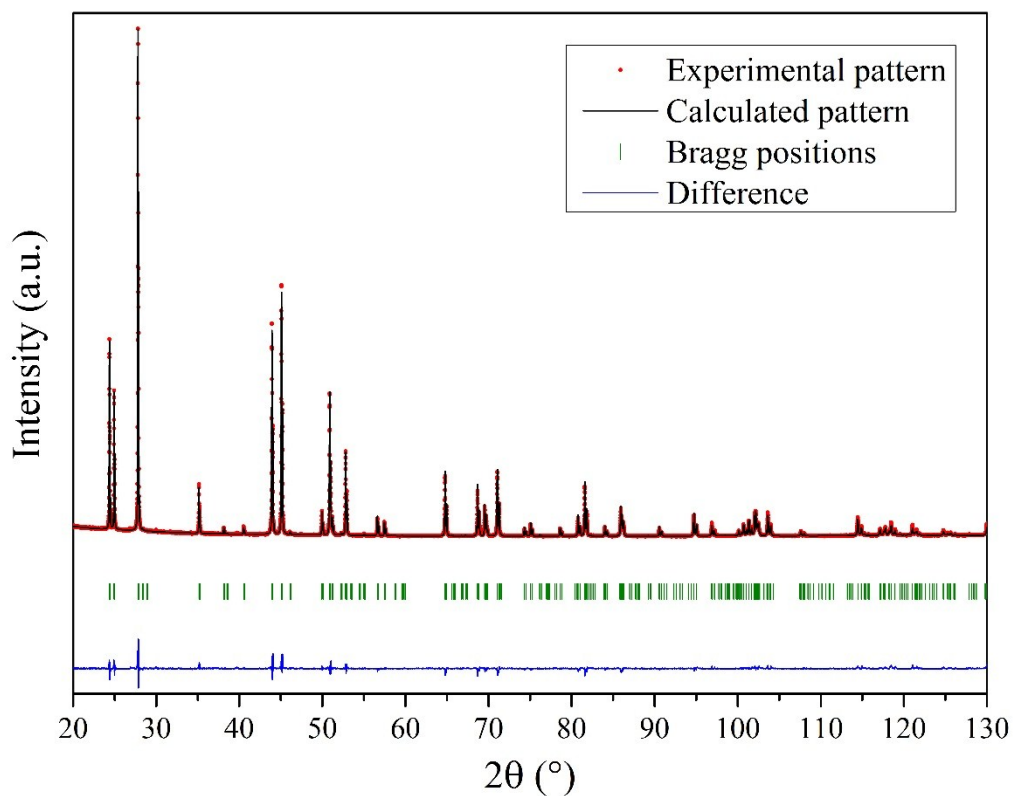

Fig. S3. Powder XRD Rietveld refinement of  $\text{Ce}_{0.95}\text{Sr}_{0.05}\text{F}_{2.95}$ .

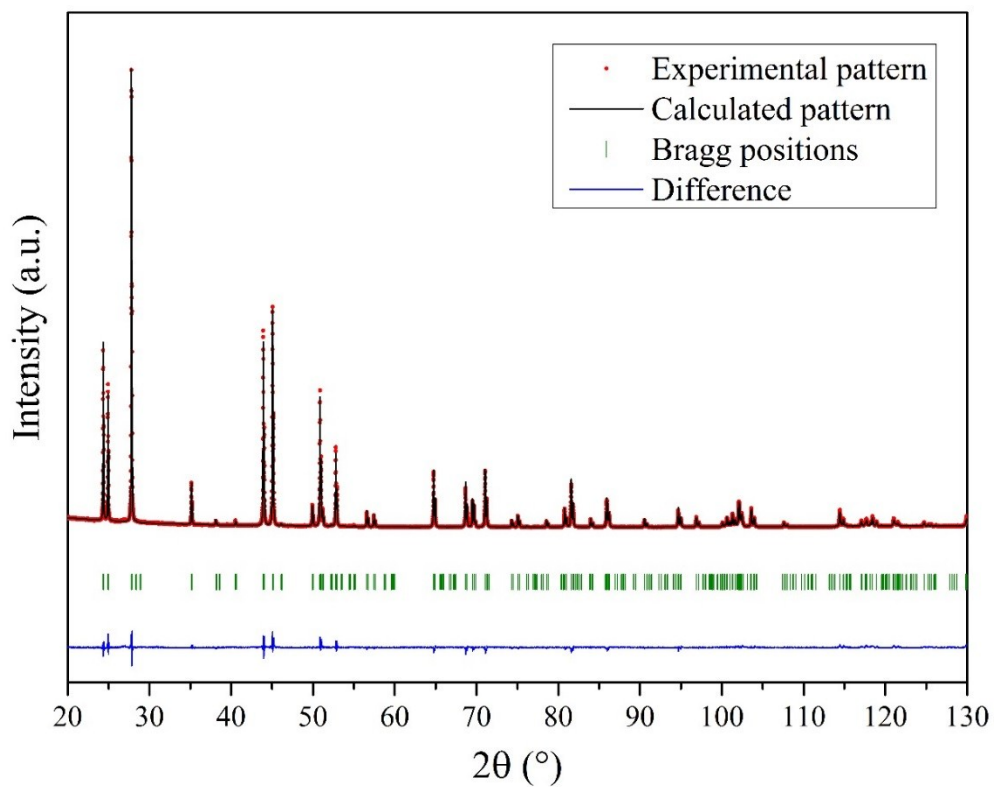

Fig. S4. Powder XRD Rietveld refinement of  $\text{Ce}_{0.93}\text{Sr}_{0.07}\text{F}_{2.93}$ .

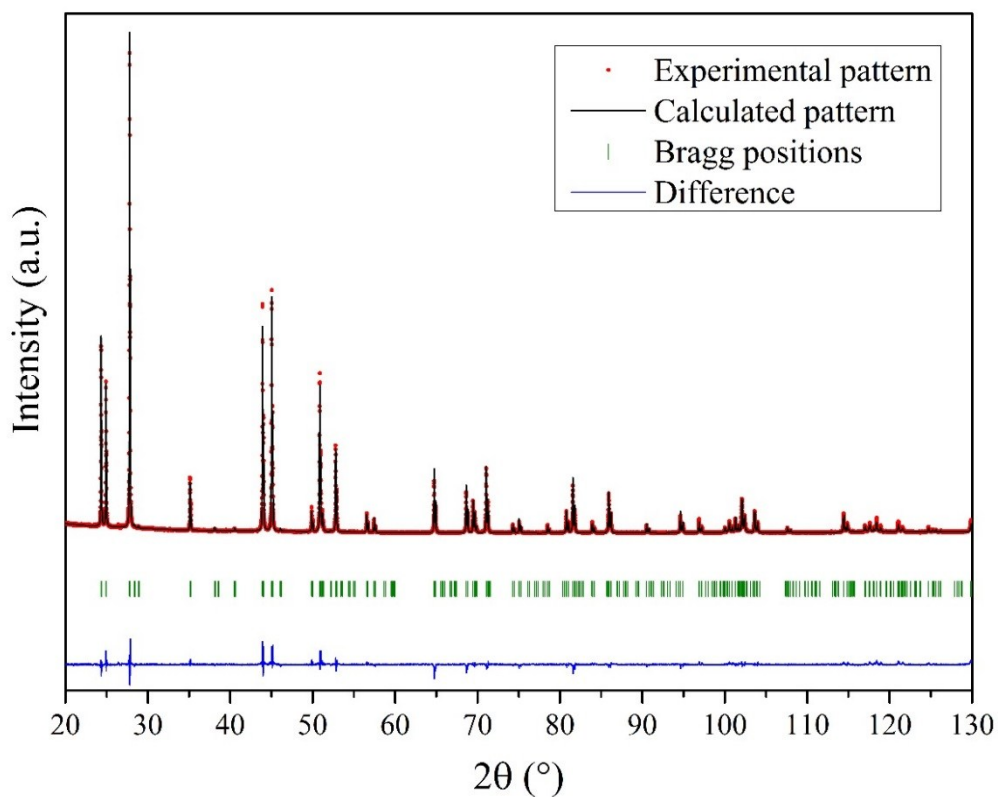

**Fig. S5.** Powder XRD Rietveld refinement of  $\text{Ce}_{0.90}\text{Sr}_{0.10}\text{F}_{2.90}$ .

**Table S1.** Unit cell parameters ( $\text{\AA}$ ) and volume ( $\text{\AA}^3$ ) of  $\text{Ce}_{1-x}\text{Sr}_x\text{F}_{3-x}$ .

| x     | a          | c         | v         |
|-------|------------|-----------|-----------|
| 0     | 7.1298(1)  | 7.2859(1) | 320.76(1) |
| 0.01  | 7.1300(1)  | 7.2870(1) | 320.83(1) |
| 0.025 | 7.1305(1)  | 7.2903(1) | 321.01(1) |
| 0.05  | 7.1310(1)  | 7.2946(2) | 321.24(1) |
| 0.07  | 7.1307(1)  | 7.2980(1) | 321.36(1) |
| 0.10  | 7.1300 (1) | 7.3023(1) | 321.50(1) |

**Table S2.** F–(Ce,Sr) distances (Å) in Ce<sub>1-x</sub>Sr<sub>x</sub>F<sub>3-x</sub>.

| x     | F1–(Ce,Sr) | <F1–(Ce,Sr)> | F2–(Ce,Sr) (x3) | F3–(Ce,Sr) (x3) |
|-------|------------|--------------|-----------------|-----------------|
| 0     | 2.417(3)   |              |                 |                 |
|       | 2.452(4)   | 2.631        | 2.395(5)        | 2.430(1)        |
|       | 2.643(7)   |              |                 |                 |
|       | 3.012(5)   |              |                 |                 |
| 0.01  | 2.410(3)   |              |                 |                 |
|       | 2.475(4)   | 2.629        | 2.432(2)        | 2.424(1)        |
|       | 2.636(6)   |              |                 |                 |
|       | 2.994(4)   |              |                 |                 |
| 0.025 | 2.407(3)   |              |                 |                 |
|       | 2.471(5)   | 2.627        | 2.465(2)        | 2.329(1)        |
|       | 2.756(9)   |              |                 |                 |
|       | 2.902(5)   |              |                 |                 |
| 0.05  | 2.413(2)   |              |                 |                 |
|       | 2.445(5)   | 2.631        | 2.435(2)        | 2.360(1)        |
|       | 2.708(7)   |              |                 |                 |
|       | 2.955(5)   |              |                 |                 |
| 0.07  | 2.427(2)   |              |                 |                 |
|       | 2.460(5)   | 2.626        | 2.430(3)        | 2.429(3)        |
|       | 2.691(9)   |              |                 |                 |
|       | 2.929(6)   |              |                 |                 |
| 0.10  | 2.446(3)   |              |                 |                 |
|       | 2.473(13)  | 2.618        | 2.429(3)        | 2.377(1)        |
|       | 2.634(8)   |              |                 |                 |
|       | 2.922(11)  |              |                 |                 |

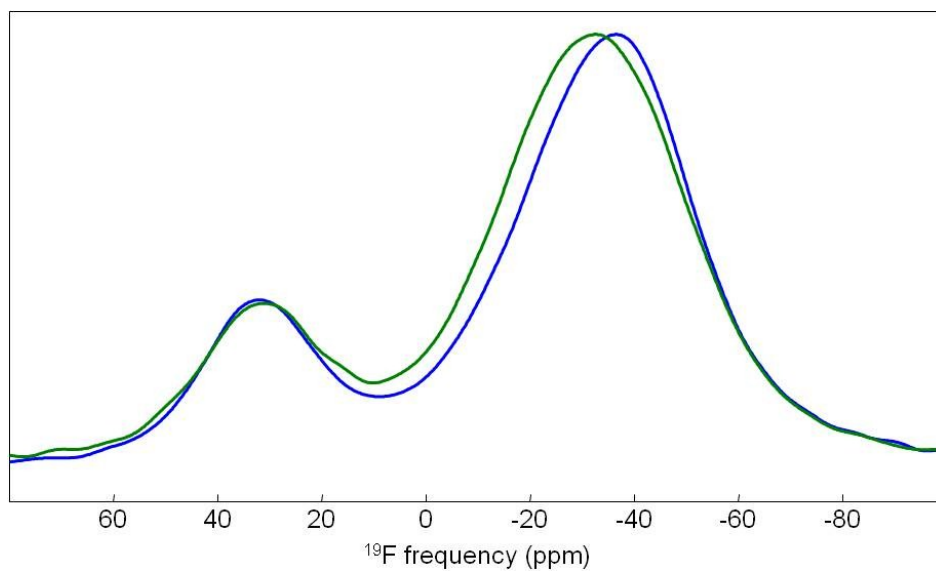

**Fig. S6.**  $^{19}\text{F}$  MAS NMR spectra of  $\text{CeF}_3$  recorded at 64 kHz (64°C, in blue) and 54 kHz (51°C, in green).

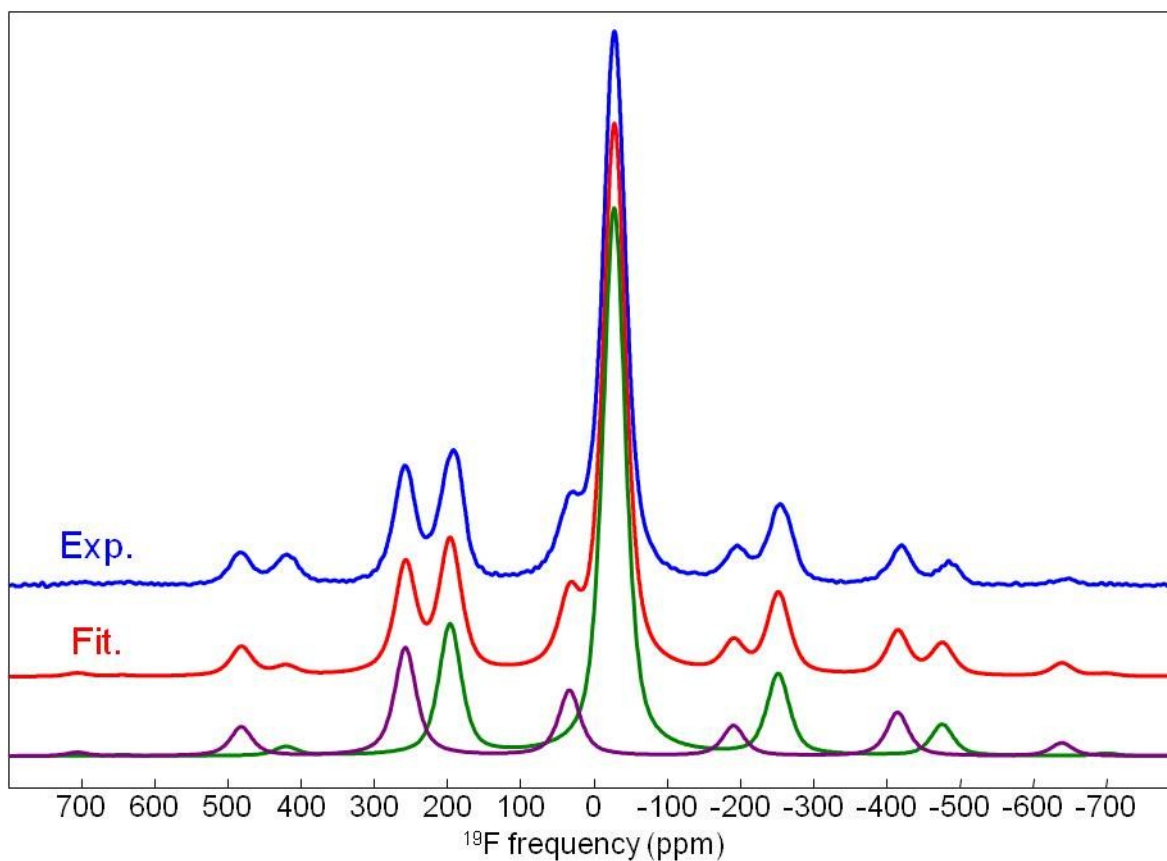

**Fig. S7.** Experimental and fitted  $^{19}\text{F}$  MAS (64 kHz) NMR spectra of  $\text{Ce}_{0.975}\text{Sr}_{0.025}\text{F}_{2.975}$ . The individual resonances used for the fit are shown below.

**Table S3.** Isotropic chemical shift ( $\delta_{\text{iso}}$ , ppm), chemical shift anisotropy ( $\delta_{\text{csa}}$ , ppm), asymmetry parameter of the CSA tensor ( $\eta_{\text{csa}}$ ), linewidth (LW, ppm), relative intensity (I, %) and assignment of the NMR resonances used for the fit of the  $^{19}\text{F}$  MAS (64 kHz) NMR spectrum of  $\text{Ce}_{0.975}\text{Sr}_{0.025}\text{F}_{2.975}$ .

| $\delta_{\text{iso}}$ | $\delta_{\text{csa}}$ | $\eta_{\text{csa}}$ | LW   | I    | Assignment |
|-----------------------|-----------------------|---------------------|------|------|------------|
| -27.8                 | -359                  | 0                   | 36.5 | 72.7 | F1         |
| 33.3                  | -763                  | 0                   | 35.5 | 27.3 | F2 and F3  |

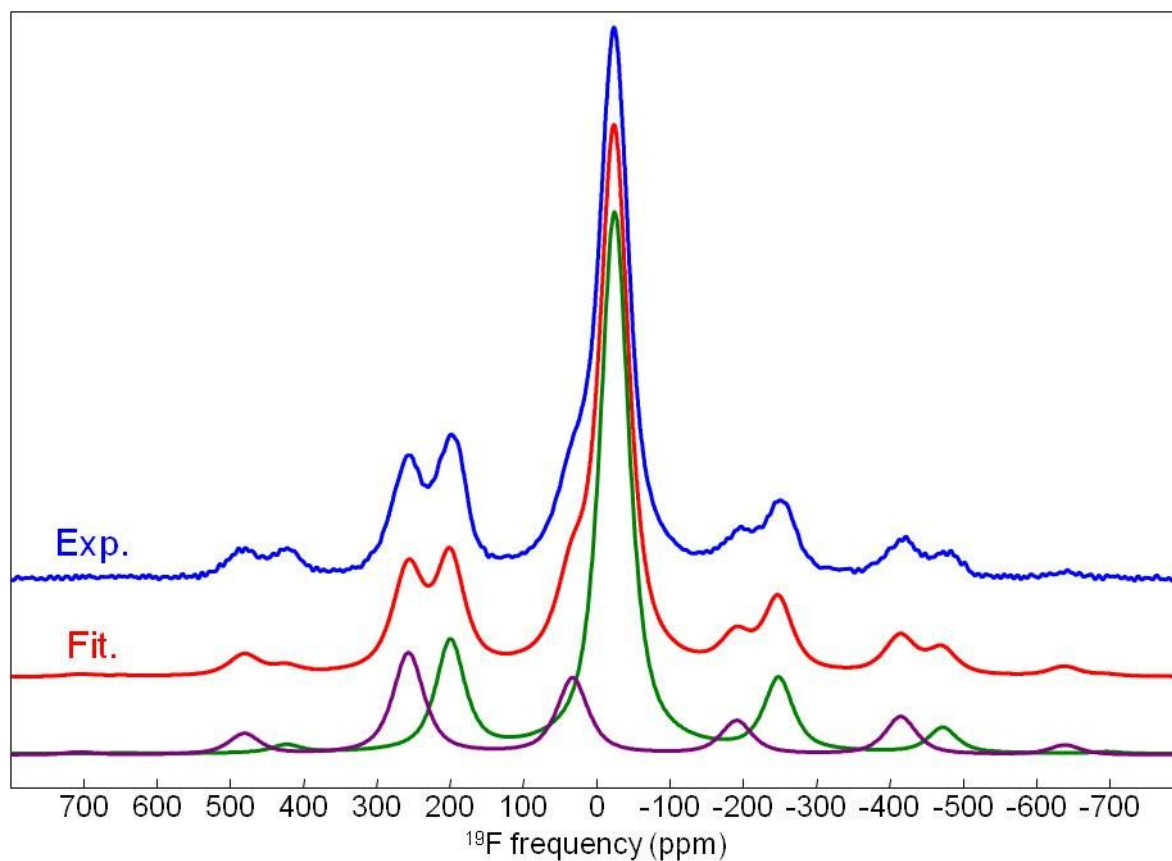

**Fig. S8.** Experimental and fitted  $^{19}\text{F}$  MAS (64 kHz) NMR spectra of  $\text{Ce}_{0.95}\text{Sr}_{0.05}\text{F}_{2.95}$ . The individual resonances used for the fit are shown below.

**Table S4.** Isotropic chemical shift ( $\delta_{\text{iso}}$ , ppm), chemical shift anisotropy ( $\delta_{\text{csa}}$ , ppm), asymmetry parameter of the CSA tensor ( $\eta_{\text{csa}}$ ), linewidth (LW, ppm), relative intensity (I, %) and assignment of the NMR resonances used for the fit of the  $^{19}\text{F}$  MAS (64 kHz) NMR spectrum of  $\text{Ce}_{0.95}\text{Sr}_{0.05}\text{F}_{2.95}$ .

| $\delta_{\text{iso}}$ | $\delta_{\text{csa}}$ | $\eta_{\text{csa}}$ | LW   | I    | Assignment |
|-----------------------|-----------------------|---------------------|------|------|------------|
| -24.2                 | -336                  | 0.2                 | 47.1 | 71.7 | F1         |
| 33.1                  | -695                  | 0                   | 50.5 | 28.3 | F2 and F3  |



**Table S5.** Relative intensities (I, %) of the  $^{19}\text{F}$  NMR resonances assigned to F1 and F2,3, expected from formulation considering fluorine vacancies on F1 site and estimated from the fits of the NMR spectra recorded at  $64^\circ\text{C}$  and fractions of mobile F2 and F3 atoms (%) calculated as (

$$\frac{I_{\text{expected}} - I_{\text{estimated}}}{I_{\text{expected}}} \quad ) \text{ in } \text{Ce}_{1-x}\text{Sr}_x\text{F}_{3-x} \text{ compounds.}$$

| x                      | 0.01 |      | 0.025 |      | 0.05 |      |
|------------------------|------|------|-------|------|------|------|
|                        | F1   | F2,3 | F1    | F2,3 | F1   | F2,3 |
| Expected I             | 66.6 | 33.4 | 66.4  | 33.6 | 66.1 | 33.9 |
| Estimated I            | 73.9 | 26.1 | 72.7  | 27.3 | 71.7 | 28.3 |
| Mobile F2 and F3 atoms | 22   |      | 19    |      | 17   |      |

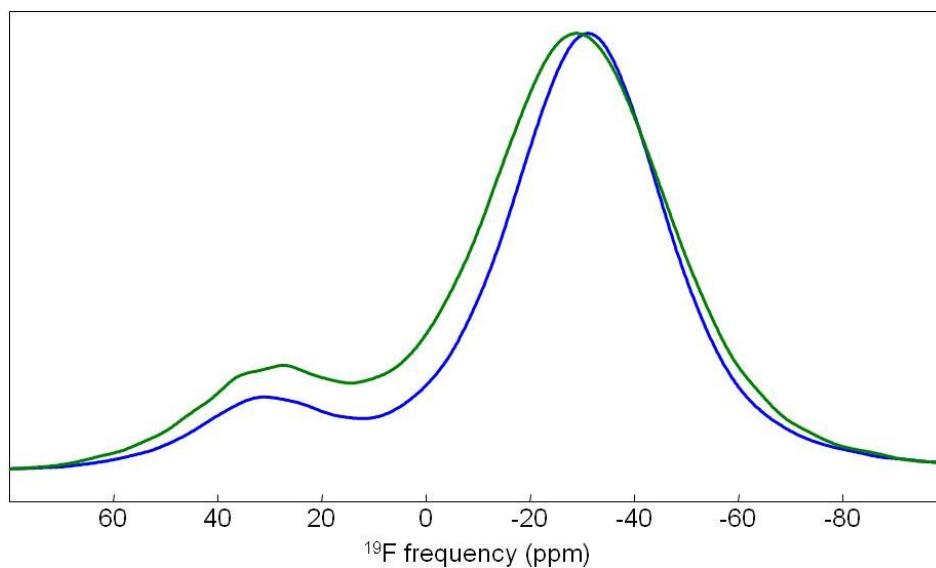

**Fig. S9.** <sup>19</sup>F MAS NMR spectra of Ce<sub>0.99</sub>Sr<sub>0.01</sub>F<sub>2.99</sub> recorded at 64 kHz (64°C, in blue) and 54 kHz (51°C, in green).

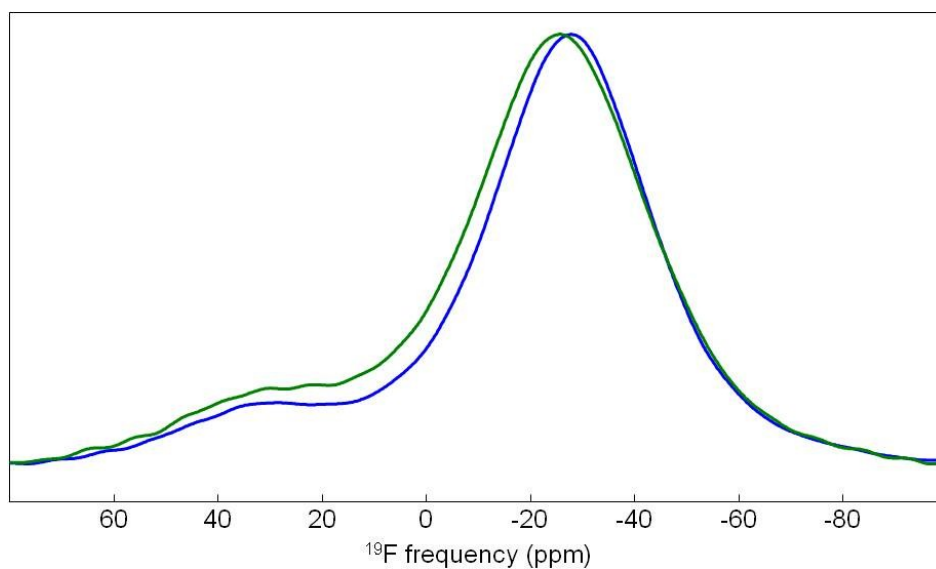

**Fig. S10.** <sup>19</sup>F MAS NMR spectra of Ce<sub>0.975</sub>Sr<sub>0.025</sub>F<sub>2.975</sub> recorded at 64 kHz (64°C, in blue) and 54 kHz (51°C, in green).

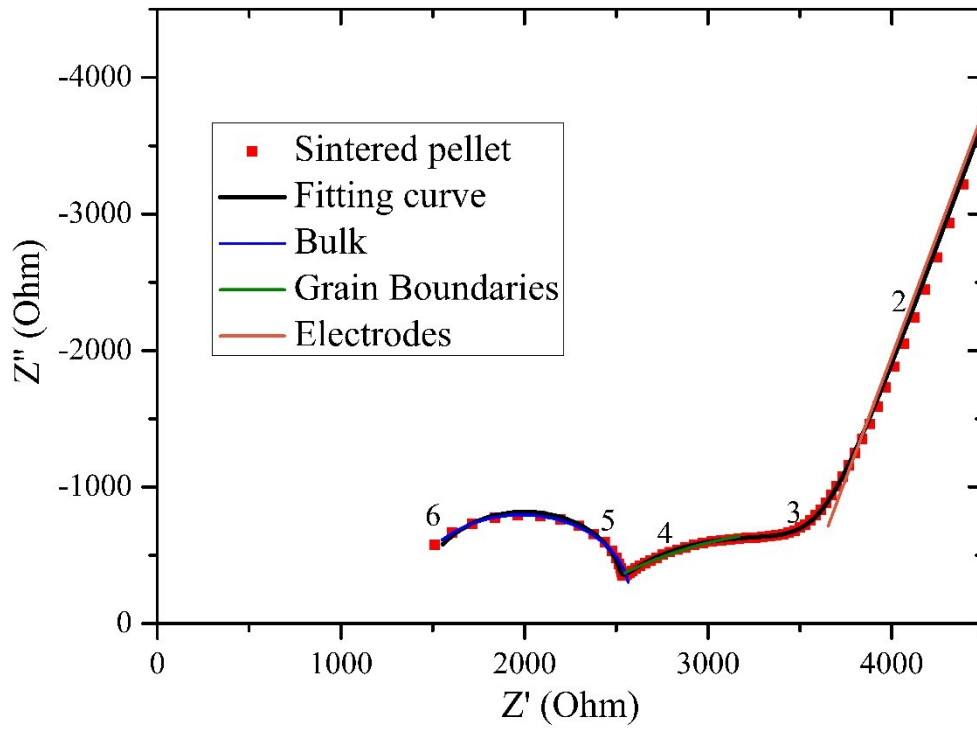

**Fig. S11.** Nyquist diagram obtained at 25 °C for a sintered pellet of  $\text{Ce}_{0.975}\text{Sr}_{0.025}\text{F}_{2.975}$ . Numbers indicate the log of the measurement frequency (e.g. 5  $\Leftrightarrow$   $10^5$  Hz).
